# Supplementary material for: Oxygen vacancies in self-assemblies of ceria nanoparticles
Source: Royal Society of Chemistry journal article supplement (doi:10.1039/c4ta02200a), 2014-01-01
Supplement: c4ta02200a1.pdf [file c4ta02200a1.pdf]

# Oxygen Vacancies in Self-Assemblies of Ceria Nanoparticles

Mahasin Alam Sk,<sup>a</sup> Sergey M. Kozlov,<sup>b</sup> Kok Hwa Lim,<sup>\*ac</sup> Annapaola Migani<sup>\*de</sup> and  
Konstantin M. Neyman<sup>bf</sup>

<sup>a</sup> School of Chemical and Biomedical Engineering, Nanyang Technological University, Singapore 639798, Singapore.

<sup>b</sup> Departament de Química Física and Institut de Química Teòrica i Computacional (IQTCUB), Universitat de Barcelona, 08028 Barcelona, Spain.

<sup>c</sup> Singapore Institute of Technology, 10 Dover Drive, Singapore 138683.

<sup>d</sup> CSIC - Consejo Superior de Investigaciones Científicas, ICN2 Building, Campus UAB, 08193 Bellaterra, Spain.

<sup>e</sup> ICN2 - Institut Català de Nanociència i Nanotecnologia, ICN2 Building, Campus UAB, 08193 Bellaterra, Spain.

<sup>f</sup> Institució Catalana de Recerca i Estudis Avançats (ICREA), 08010 Barcelona, Spain.

## Supporting Information

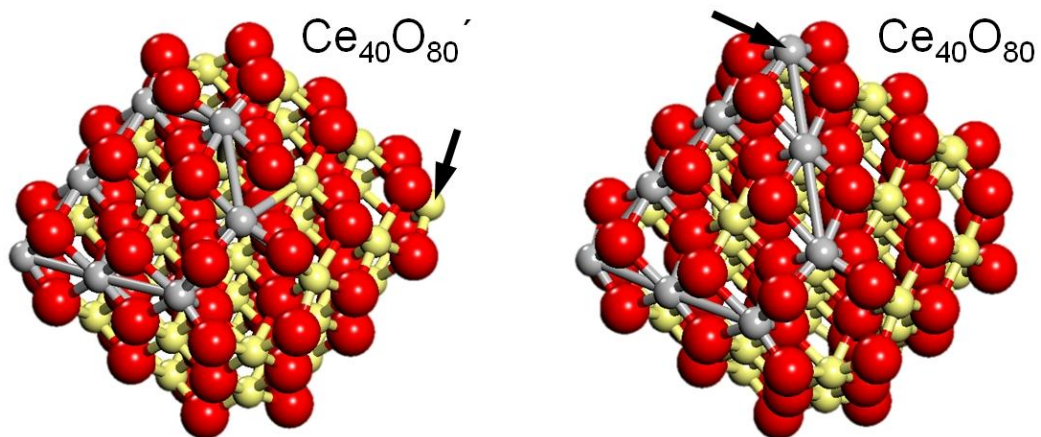

**Fig. S1.** Sketches of the stoichiometric ceria nanoparticles  $\text{Ce}_{40}\text{O}_{80}'$  and  $\text{Ce}_{40}\text{O}_{80}$ . Corner Ce atoms that make these nanoparticles different are marked by arrows.  $\text{O}^{2-}$  anions – red spheres,  $\text{Ce}^{4+}$  cations – light beige spheres, those on edges of one  $\{111\}$  facet – grey spheres.

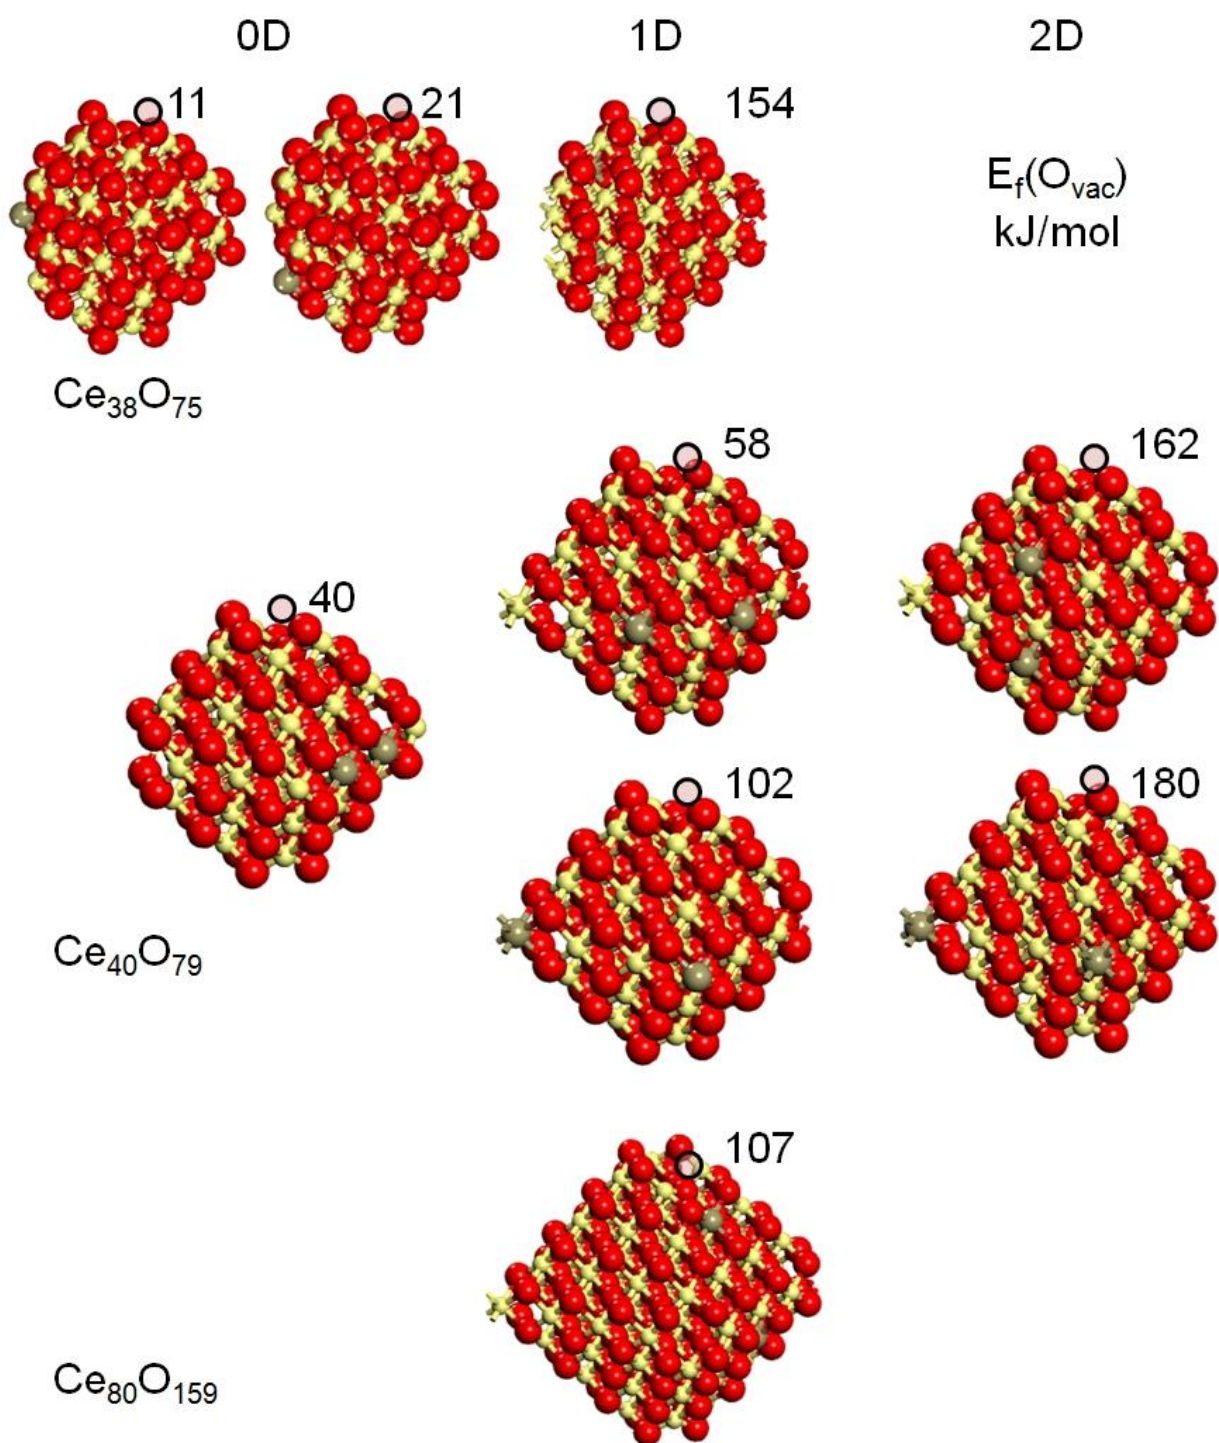

**Fig. S2.** Oxygen defective NPs for the 0D, 1D and 2D structures displayed in Fig. 1 containing one per NP most easily formed  $\text{O}_{2c}$  vacancy at the top  $\text{O}_4$  sites with the corresponding oxygen vacancy formation energies  $E_f(\text{O}_{\text{vac}})$  [kJ/mol] calculated vs.  $\frac{1}{2} \text{O}_2$  triplet state energy. The depicted  $\text{Ce}^{3+}$  configurations result in  $E_f(\text{O}_{\text{vac}})$  [kJ/mol] values, which are larger than the lowest energy values reported in Fig. 3.  $\text{Ce}^{4+}$  cations – light beige spheres,  $\text{Ce}^{3+}$  cations – dark beige spheres,  $\text{O}^{2-}$  anions – red spheres, position of  $\text{O}_{\text{vac}}$  – black circles. As a result of the adopted orientation, only one  $\text{Ce}^{3+}$  cation is visible for 1D  $\text{Ce}_{80}\text{O}_{159}$ .

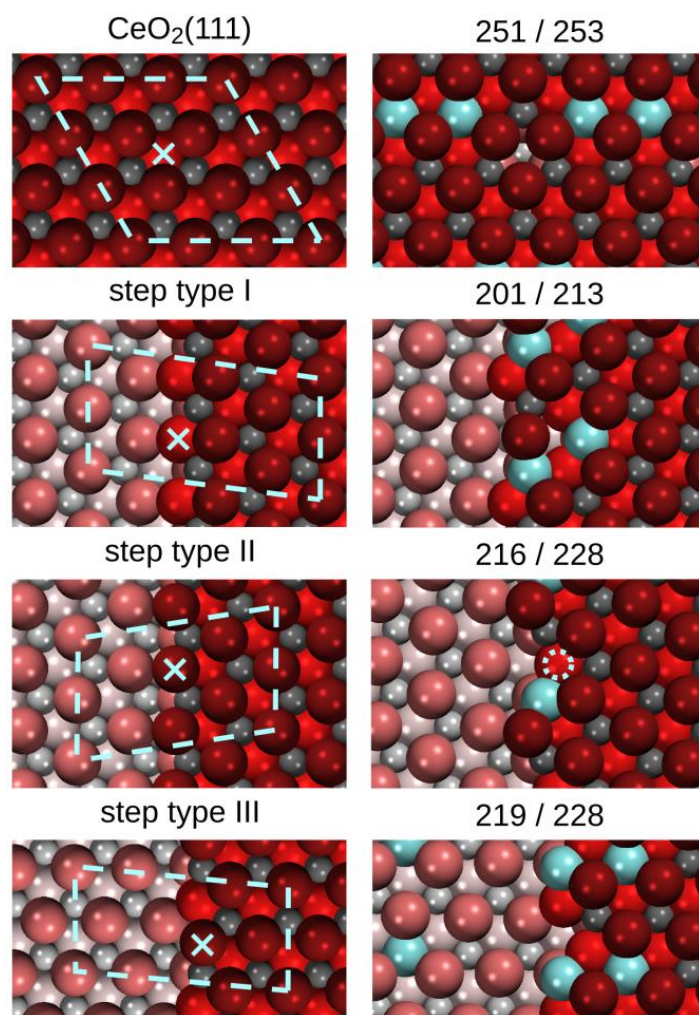

**Fig. S3.** Top view of the regular and three types of vicinal stepped  $\text{CeO}_2(111)$  surfaces without O vacancy (left panels) and with the computed most easily formed O vacancy (right panels). The corresponding lowest oxygen vacancy formation energies  $E_f(\text{O}_{\text{vac}})$  [kJ/mol] calculated vs.  $\frac{1}{2} \text{O}_2$  triplet state energy obtained with PW91+4 / HSE06 are given.  $\text{Ce}^{4+}$  cations – grey spheres, surface  $\text{Ce}^{3+}$  cations – cyan spheres, subsurface  $\text{Ce}^{3+}$  cations – dotted cyan circles,  $\text{O}^{2-}$  anions – red spheres, position of  $\text{O}_{\text{vac}}$  – cyan cross. The darkest colors indicate atoms located in the uppermost surface layer. The dashed parallelogram indicates the  $a \cdot b$  unit cell.

**Cartesian coordinates (Å) of atoms in the PW91+4 optimized  $Ce_nO_{2n}$  nanoparticles (n=38, 40, 80, 140)**

**$Ce_{38}O_{76}$**

|    |           |           |           |
|----|-----------|-----------|-----------|
| Ce | 14.142180 | 12.513730 | 3.826150  |
| Ce | 11.906700 | 12.517990 | 12.171840 |
| Ce | 14.376080 | 9.622120  | 12.388240 |
| Ce | 9.056830  | 9.802890  | 12.227790 |
| Ce | 14.403540 | 15.392500 | 12.394850 |
| Ce | 11.607720 | 7.107750  | 6.863330  |
| Ce | 14.721240 | 12.508580 | 9.501480  |
| Ce | 11.920860 | 15.189920 | 9.505700  |
| Ce | 11.604520 | 7.098500  | 12.130010 |
| Ce | 11.894890 | 9.852510  | 9.501260  |
| Ce | 9.055520  | 9.810120  | 6.769140  |
| Ce | 9.140420  | 12.530300 | 14.809530 |
| Ce | 16.847560 | 15.598160 | 9.508850  |
| Ce | 6.498950  | 12.544090 | 12.077870 |
| Ce | 11.622360 | 9.893230  | 4.079430  |
| Ce | 9.302970  | 12.533920 | 9.502950  |
| Ce | 6.513030  | 15.123490 | 9.504390  |
| Ce | 6.500870  | 12.551360 | 6.923900  |
| Ce | 11.617800 | 9.884890  | 14.922280 |
| Ce | 16.837390 | 12.500410 | 6.403420  |
| Ce | 14.379110 | 9.625110  | 6.614810  |
| Ce | 11.662070 | 17.945440 | 6.873900  |
| Ce | 11.657530 | 17.940930 | 12.142700 |
| Ce | 9.167220  | 17.839340 | 9.506110  |
| Ce | 9.081800  | 15.261980 | 12.235560 |
| Ce | 11.642090 | 15.153760 | 14.926510 |
| Ce | 9.145530  | 12.540420 | 4.194310  |
| Ce | 11.650310 | 15.162510 | 4.085300  |
| Ce | 14.407960 | 15.396140 | 6.621400  |
| Ce | 9.085240  | 15.266370 | 6.774720  |
| Ce | 9.113580  | 7.229860  | 9.494590  |
| Ce | 11.907440 | 12.523320 | 6.834720  |
| Ce | 16.829710 | 12.493880 | 12.605960 |
| Ce | 6.483730  | 9.971760  | 9.499310  |
| Ce | 14.136280 | 12.509630 | 15.182960 |
| Ce | 14.166590 | 18.189410 | 9.512200  |
| Ce | 14.112470 | 6.835520  | 9.498450  |
| Ce | 16.818270 | 9.397090  | 9.504720  |
| O  | 13.198290 | 5.884170  | 7.906800  |
| O  | 10.077310 | 6.061150  | 11.136010 |
| O  | 13.233270 | 14.102610 | 16.141340 |

|   |           |           |           |
|---|-----------|-----------|-----------|
| O | 16.341470 | 13.912590 | 10.920240 |
| O | 16.326140 | 11.080730 | 10.920700 |
| O | 16.339000 | 13.917130 | 8.088290  |
| O | 13.153770 | 13.890570 | 5.459290  |
| O | 10.677440 | 13.871790 | 10.850700 |
| O | 7.978800  | 13.856560 | 10.821050 |
| O | 13.218270 | 16.627410 | 5.399520  |
| O | 10.098550 | 10.883680 | 15.969880 |
| O | 7.981040  | 13.859500 | 8.184600  |
| O | 13.160960 | 16.561340 | 10.881130 |
| O | 10.663250 | 11.179070 | 10.848560 |
| O | 13.224440 | 10.930100 | 2.865710  |
| O | 13.534420 | 13.876840 | 10.869490 |
| O | 7.795460  | 16.594250 | 10.900050 |
| O | 13.260630 | 19.150180 | 11.102830 |
| O | 10.493620 | 8.577610  | 8.183750  |
| O | 13.518990 | 11.149600 | 10.865870 |
| O | 7.771220  | 11.151640 | 5.443280  |
| O | 15.891230 | 13.920980 | 5.285010  |
| O | 10.508800 | 11.217550 | 5.546930  |
| O | 5.418910  | 14.146200 | 7.907980  |
| O | 13.122090 | 8.471800  | 8.125620  |
| O | 10.114830 | 14.165270 | 15.972880 |
| O | 13.175030 | 8.402200  | 13.608340 |
| O | 13.523660 | 11.150520 | 8.137220  |
| O | 13.164330 | 16.563210 | 8.135600  |
| O | 10.079810 | 6.065040  | 7.856330  |
| O | 10.123660 | 14.179010 | 3.036300  |
| O | 15.856400 | 8.278710  | 10.915630 |
| O | 10.523360 | 13.846420 | 5.551030  |
| O | 10.678710 | 13.874540 | 8.157730  |
| O | 15.856850 | 8.282430  | 8.089230  |
| O | 10.404220 | 16.618740 | 5.421390  |
| O | 7.767410  | 11.144360 | 13.554530 |
| O | 7.966250  | 11.223820 | 8.182110  |
| O | 5.415820  | 14.141820 | 11.091560 |
| O | 10.397840 | 16.611010 | 13.594120 |
| O | 10.358660 | 8.440660  | 13.583170 |
| O | 10.533800 | 16.481730 | 8.191920  |
| O | 13.196330 | 5.880480  | 11.087240 |
| O | 13.176040 | 8.408930  | 5.389620  |
| O | 10.141260 | 18.995150 | 11.150140 |
| O | 10.361700 | 8.448810  | 5.411410  |
| O | 13.136690 | 11.145160 | 5.454840  |
| O | 13.216570 | 10.921560 | 16.136850 |
| O | 7.964040  | 11.220740 | 10.818450 |
| O | 10.531940 | 16.478860 | 10.821680 |
| O | 13.146400 | 13.884760 | 13.552500 |

|   |           |           |           |
|---|-----------|-----------|-----------|
| O | 13.121240 | 8.469160  | 10.871880 |
| O | 7.754690  | 8.488290  | 8.102030  |
| O | 5.398800  | 10.961930 | 11.090300 |
| O | 7.787310  | 13.941280 | 5.447070  |
| O | 13.262340 | 19.152130 | 7.921390  |
| O | 5.401490  | 10.964010 | 7.906900  |
| O | 16.333350 | 11.085440 | 8.087990  |
| O | 10.505910 | 11.209500 | 13.454920 |
| O | 10.518610 | 13.839030 | 13.457530 |
| O | 13.532770 | 13.878230 | 8.141580  |
| O | 7.795750  | 16.597820 | 8.110790  |
| O | 15.872070 | 11.092670 | 5.283300  |
| O | 15.881600 | 13.912400 | 13.726650 |
| O | 15.901560 | 16.723950 | 8.094670  |
| O | 10.665250 | 11.182000 | 8.154830  |
| O | 15.868640 | 11.084840 | 13.725940 |
| O | 10.144000 | 18.998560 | 7.868840  |
| O | 7.782020  | 13.932580 | 13.557390 |
| O | 13.212520 | 16.620560 | 13.617850 |
| O | 7.754040  | 8.485470  | 10.891180 |
| O | 13.241410 | 14.111080 | 2.871020  |
| O | 10.492510 | 8.574890  | 10.813070 |
| O | 15.897430 | 16.721080 | 10.923450 |
| O | 13.133780 | 11.139400 | 13.549260 |
| O | 10.106390 | 10.897790 | 3.031290  |

**Ce<sub>40</sub>O<sub>80</sub>**

|    |           |           |           |
|----|-----------|-----------|-----------|
| Ce | 13.519630 | 9.491950  | 4.044180  |
| Ce | 10.984420 | 9.496040  | 12.163950 |
| Ce | 13.637880 | 6.705800  | 12.280810 |
| Ce | 8.309480  | 6.734180  | 12.275380 |
| Ce | 13.666430 | 12.259660 | 12.282400 |
| Ce | 10.961220 | 4.101950  | 6.876860  |
| Ce | 13.607280 | 9.485130  | 9.506040  |
| Ce | 11.001300 | 12.158570 | 9.504990  |
| Ce | 10.960000 | 4.097100  | 12.116340 |
| Ce | 10.975190 | 6.838250  | 9.500460  |
| Ce | 8.312430  | 6.739880  | 6.721460  |
| Ce | 8.462010  | 9.508070  | 14.967710 |
| Ce | 16.159580 | 12.230170 | 9.509560  |
| Ce | 5.830530  | 9.521970  | 12.258700 |
| Ce | 10.982790 | 6.885560  | 4.103290  |
| Ce | 8.367680  | 9.511880  | 9.501550  |
| Ce | 5.842480  | 12.281410 | 9.501430  |
| Ce | 5.833110  | 9.524900  | 6.742920  |
| Ce | 10.972350 | 6.872540  | 14.901000 |
| Ce | 16.148820 | 9.475710  | 6.753660  |
| Ce | 13.643010 | 6.711070  | 6.725210  |
| Ce | 11.017630 | 14.898690 | 6.889190  |
| Ce | 11.014190 | 14.895490 | 12.127190 |
| Ce | 8.489540  | 14.972640 | 9.505830  |
| Ce | 8.334910  | 12.288330 | 12.279780 |
| Ce | 3.453940  | 9.537820  | 9.499320  |
| Ce | 10.999160 | 12.114200 | 14.900800 |
| Ce | 8.469130  | 9.516020  | 4.036480  |
| Ce | 11.005310 | 12.123350 | 4.109530  |
| Ce | 13.669570 | 12.263860 | 6.731350  |
| Ce | 18.525370 | 9.459090  | 9.510700  |
| Ce | 8.337580  | 12.290420 | 6.724940  |
| Ce | 8.433570  | 4.052760  | 9.495530  |
| Ce | 10.990270 | 9.501380  | 6.844620  |
| Ce | 16.144650 | 9.470080  | 12.263030 |
| Ce | 5.817400  | 6.768440  | 9.498260  |
| Ce | 13.510060 | 9.480430  | 14.965320 |
| Ce | 13.541070 | 14.949630 | 9.510450  |
| Ce | 13.487000 | 4.027470  | 9.497160  |
| Ce | 16.134150 | 6.715800  | 9.506460  |
| O  | 12.535960 | 2.980900  | 7.893210  |
| O  | 9.375310  | 2.991450  | 11.095280 |
| O  | 12.569000 | 11.085730 | 16.017910 |
| O  | 14.996600 | 10.831010 | 10.859510 |
| O  | 14.982560 | 8.125210  | 10.859000 |
| O  | 14.997900 | 10.832540 | 8.155000  |



|   |           |           |           |
|---|-----------|-----------|-----------|
| O | 12.324420 | 10.828110 | 5.517300  |
| O | 9.624640  | 10.861110 | 10.860040 |
| O | 6.990760  | 10.870810 | 10.853940 |
| O | 12.409320 | 13.563010 | 5.440270  |
| O | 9.400210  | 7.899940  | 16.017690 |
| O | 17.671670 | 10.842160 | 10.889820 |
| O | 6.992450  | 10.871940 | 8.148420  |
| O | 12.333960 | 13.481880 | 10.840070 |
| O | 9.611490  | 8.146820  | 10.858550 |
| O | 12.565440 | 7.898610  | 2.988560  |
| O | 12.362140 | 10.848150 | 10.862260 |
| O | 6.913650  | 13.584830 | 10.888680 |
| O | 12.598230 | 16.005920 | 11.109720 |
| O | 9.643020  | 5.517150  | 8.164780  |
| O | 12.348120 | 8.133230  | 10.860930 |
| O | 6.888120  | 8.131280  | 5.436180  |
| O | 17.657010 | 8.082930  | 10.887500 |
| O | 15.095690 | 10.865930 | 5.441370  |
| O | 9.659480  | 8.177500  | 5.510090  |
| O | 4.319610  | 10.913660 | 8.121160  |
| O | 12.294070 | 5.503960  | 8.166230  |
| O | 9.416070  | 11.103040 | 16.019200 |
| O | 12.367930 | 5.419180  | 13.568840 |
| O | 12.353860 | 8.135690  | 8.146330  |
| O | 12.335480 | 13.483410 | 8.175050  |
| O | 9.378460  | 2.994650  | 7.892820  |
| O | 9.424220  | 11.112920 | 2.987900  |
| O | 15.062570 | 5.412120  | 10.890130 |
| O | 9.672040  | 10.841620 | 5.512860  |
| O | 9.626670  | 10.863380 | 8.145800  |
| O | 15.064270 | 5.413980  | 8.118050  |
| O | 9.610140  | 13.576440 | 5.436800  |
| O | 6.884180  | 8.129090  | 13.565120 |
| O | 6.981630  | 8.167280  | 8.146950  |
| O | 4.317830  | 10.912640 | 10.878970 |
| O | 9.606540  | 13.571070 | 13.572760 |
| O | 9.570970  | 5.434770  | 13.565710 |
| O | 9.682760  | 13.496190 | 8.172950  |
| O | 12.531510 | 2.976790  | 11.096310 |
| O | 12.374510 | 5.428990  | 5.430130  |
| O | 9.443020  | 16.019060 | 11.109690 |
| O | 9.574960  | 5.443110  | 5.429540  |
| O | 12.311600 | 8.163780  | 5.513580  |
| O | 12.554850 | 7.882050  | 16.017210 |
| O | 6.979270  | 8.165100  | 10.852430 |
| O | 9.682010  | 13.494520 | 10.838700 |
| O | 12.318840 | 10.820720 | 13.493940 |
| O | 12.293120 | 5.501310  | 10.832970 |

|   |           |           |           |
|---|-----------|-----------|-----------|
| O | 6.874260  | 5.454320  | 8.112020  |
| O | 4.305660  | 8.152240  | 10.878110 |
| O | 6.903660  | 10.906600 | 5.434530  |
| O | 12.600840 | 16.006640 | 7.907700  |
| O | 4.307610  | 8.153600  | 8.119770  |
| O | 14.987880 | 8.127010  | 8.155060  |
| O | 9.652430  | 8.169340  | 13.493310 |
| O | 9.666100  | 10.835810 | 13.493970 |
| O | 12.364570 | 10.850490 | 8.148860  |
| O | 6.914430  | 13.585840 | 8.116560  |
| O | 15.080450 | 8.095060  | 5.440960  |
| O | 15.089340 | 10.861020 | 13.571930 |
| O | 17.661450 | 8.085980  | 8.129940  |
| O | 17.673240 | 10.845860 | 8.132490  |
| O | 15.104520 | 13.543570 | 8.122730  |
| O | 9.614890  | 8.149730  | 8.143960  |
| O | 15.072990 | 8.088780  | 13.572010 |
| O | 9.445580  | 16.021610 | 7.907680  |
| O | 6.898560  | 10.902380 | 13.567980 |
| O | 12.405280 | 13.557170 | 13.574350 |
| O | 6.872550  | 5.452300  | 10.883140 |
| O | 12.579930 | 11.100510 | 2.994050  |
| O | 9.641510  | 5.514480  | 10.831200 |
| O | 15.103430 | 13.544350 | 10.896220 |
| O | 12.302920 | 8.155130  | 13.494030 |
| O | 9.411080  | 7.912550  | 2.984770  |

**Ce<sub>40</sub>O<sub>80</sub>**

|    |           |           |           |
|----|-----------|-----------|-----------|
| Ce | 15.092520 | 12.486140 | 7.080280  |
| Ce | 12.445610 | 9.915520  | 12.437830 |
| Ce | 9.793190  | 9.770790  | 9.660550  |
| Ce | 9.935490  | 12.499730 | 17.942440 |
| Ce | 17.950130 | 15.026550 | 12.444160 |
| Ce | 7.266830  | 12.525940 | 15.204340 |
| Ce | 12.508480 | 9.923170  | 7.078540  |
| Ce | 9.817210  | 12.550430 | 12.441260 |
| Ce | 7.222070  | 15.237060 | 12.445030 |
| Ce | 7.268500  | 12.532690 | 9.676750  |
| Ce | 12.504230 | 9.908840  | 17.798140 |
| Ce | 12.456680 | 12.548560 | 15.104960 |
| Ce | 17.837090 | 12.474800 | 9.839270  |
| Ce | 15.195680 | 9.796460  | 9.702630  |
| Ce | 12.522620 | 17.747720 | 9.684500  |
| Ce | 12.516710 | 17.742950 | 15.214300 |
| Ce | 9.812930  | 17.811780 | 12.451150 |
| Ce | 9.774600  | 15.253280 | 15.265820 |
| Ce | 4.858630  | 12.538240 | 12.437520 |
| Ce | 12.519440 | 15.066000 | 17.945600 |
| Ce | 9.937620  | 12.509970 | 6.944910  |
| Ce | 12.521800 | 15.077000 | 6.946740  |
| Ce | 15.193630 | 9.790330  | 15.175620 |
| Ce | 15.266420 | 15.202070 | 9.668260  |
| Ce | 12.529460 | 20.154400 | 12.454190 |
| Ce | 9.776030  | 15.262640 | 9.628040  |
| Ce | 9.943760  | 7.074320  | 12.434150 |
| Ce | 12.458660 | 12.559420 | 9.780130  |
| Ce | 17.836450 | 12.468560 | 15.044010 |
| Ce | 7.281810  | 9.779570  | 12.436460 |
| Ce | 15.088910 | 12.474870 | 17.803990 |
| Ce | 15.265940 | 17.709490 | 12.448470 |
| Ce | 15.055300 | 7.206450  | 12.433980 |
| Ce | 9.788110  | 9.762850  | 15.215310 |
| Ce | 17.782910 | 9.914490  | 12.440790 |
| Ce | 15.262560 | 15.194290 | 15.226460 |
| Ce | 12.500100 | 7.170930  | 9.831910  |
| Ce | 15.092570 | 12.542050 | 12.443430 |
| Ce | 12.482300 | 15.196060 | 12.448730 |
| Ce | 12.499450 | 7.165740  | 15.034390 |
| O  | 16.390320 | 11.219470 | 11.114250 |
| O  | 11.111780 | 11.226610 | 16.434080 |
| O  | 11.118980 | 13.896330 | 16.462420 |
| O  | 13.789820 | 13.963100 | 11.085730 |
| O  | 8.384210  | 16.662630 | 11.096250 |
| O  | 16.508080 | 11.154020 | 8.363670  |

|   |           |           |           |
|---|-----------|-----------|-----------|
| O | 16.510360 | 13.941790 | 16.512260 |
| O | 13.857880 | 19.275580 | 11.065350 |
| O | 11.102740 | 19.262590 | 11.101230 |
| O | 16.532930 | 16.657410 | 11.053510 |
| O | 11.040990 | 11.235170 | 11.079850 |
| O | 16.506130 | 11.148750 | 16.517800 |
| O | 18.981730 | 14.089580 | 10.854070 |
| O | 8.352210  | 13.968210 | 16.491690 |
| O | 13.845800 | 16.675590 | 16.521960 |
| O | 8.320950  | 8.505510  | 13.829330 |
| O | 14.064000 | 14.131460 | 5.916820  |
| O | 11.105320 | 8.580700  | 13.771960 |
| O | 16.529320 | 16.656800 | 13.840650 |
| O | 13.767750 | 11.222780 | 16.401180 |
| O | 10.872830 | 10.965030 | 5.912370  |
| O | 14.042720 | 6.084260  | 10.826840 |
| O | 10.874500 | 6.033570  | 14.018890 |
| O | 14.059460 | 14.118310 | 18.973560 |
| O | 16.435530 | 13.871860 | 13.780380 |
| O | 16.389960 | 11.216750 | 13.767840 |
| O | 16.436740 | 13.873660 | 11.110260 |
| O | 13.790180 | 13.891630 | 8.450620  |
| O | 11.060990 | 13.959560 | 13.803280 |
| O | 8.421380  | 13.924260 | 13.798810 |
| O | 13.851880 | 16.690720 | 8.373450  |
| O | 10.868710 | 10.951380 | 18.968830 |
| O | 11.103890 | 19.257050 | 13.811770 |
| O | 8.422760  | 13.927760 | 11.090200 |
| O | 13.818890 | 16.589070 | 13.800550 |
| O | 11.039250 | 11.230660 | 13.799190 |
| O | 14.071390 | 10.933300 | 5.969650  |
| O | 13.788380 | 13.958270 | 13.805240 |
| O | 8.381100  | 16.659740 | 13.797010 |
| O | 18.910310 | 10.914690 | 14.051460 |
| O | 11.107470 | 8.583790  | 11.101850 |
| O | 13.762790 | 11.233500 | 13.793580 |
| O | 8.317080  | 11.194340 | 8.364090  |
| O | 13.858190 | 19.273940 | 13.839230 |
| O | 16.513790 | 13.949030 | 8.378400  |
| O | 11.115540 | 11.237710 | 8.446990  |
| O | 5.765700  | 13.959770 | 11.085000 |
| O | 13.760970 | 8.608280  | 11.110190 |
| O | 10.898420 | 14.112520 | 19.009050 |
| O | 13.827700 | 8.484530  | 16.512880 |
| O | 13.763040 | 11.237620 | 11.089020 |
| O | 13.822840 | 16.590220 | 11.095180 |
| O | 10.874890 | 6.038380  | 10.843470 |
| O | 10.905650 | 14.123380 | 5.879950  |

|   |           |           |           |
|---|-----------|-----------|-----------|
| O | 16.490880 | 8.484910  | 13.830820 |
| O | 11.120550 | 13.907090 | 8.427300  |
| O | 11.061850 | 13.965890 | 11.085300 |
| O | 16.491920 | 8.486440  | 11.045090 |
| O | 11.068290 | 16.674630 | 8.400610  |
| O | 8.311710  | 11.185240 | 16.513530 |
| O | 8.414600  | 11.220720 | 11.087140 |
| O | 5.763860  | 13.956450 | 13.794440 |
| O | 11.064960 | 16.665260 | 16.497230 |
| O | 11.030450 | 8.503910  | 16.503080 |
| O | 11.119680 | 16.606370 | 11.095420 |
| O | 14.041340 | 6.080720  | 14.039380 |
| O | 13.828910 | 8.494930  | 8.360960  |
| O | 18.982670 | 14.083890 | 14.028630 |
| O | 11.034580 | 8.514010  | 8.368630  |
| O | 13.770950 | 11.234830 | 8.479320  |
| O | 14.065160 | 10.917660 | 18.908420 |
| O | 8.412190  | 11.217950 | 13.792210 |
| O | 11.115620 | 16.600170 | 13.803780 |
| O | 13.787780 | 13.878310 | 16.439450 |
| O | 13.759870 | 8.605390  | 13.762730 |
| O | 8.323780  | 8.509110  | 11.041750 |
| O | 5.726590  | 11.200510 | 13.822480 |
| O | 8.354440  | 13.977980 | 8.396710  |
| O | 18.911070 | 10.920850 | 10.835380 |
| O | 5.728910  | 11.204020 | 11.048770 |

**Ce<sub>80</sub>O<sub>160</sub>**

|    |           |           |           |
|----|-----------|-----------|-----------|
| Ce | 17.614970 | 12.500050 | 20.548450 |
| Ce | 15.041810 | 15.094610 | 20.578650 |
| Ce | 15.041880 | 9.905390  | 20.578680 |
| Ce | 17.614970 | 12.500050 | 4.451550  |
| Ce | 12.478180 | 12.500010 | 20.647550 |
| Ce | 15.041880 | 9.905390  | 4.421320  |
| Ce | 15.041810 | 15.094610 | 4.421350  |
| Ce | 12.478180 | 12.500010 | 4.352450  |
| Ce | 15.010410 | 12.499930 | 17.820550 |
| Ce | 15.010410 | 12.499930 | 7.179450  |
| Ce | 20.329340 | 12.500010 | 17.811470 |
| Ce | 15.024960 | 17.830390 | 17.830410 |
| Ce | 15.025090 | 7.169600  | 17.830370 |
| Ce | 20.329340 | 12.500010 | 7.188530  |
| Ce | 9.781870  | 12.499980 | 17.946180 |
| Ce | 15.025090 | 7.169600  | 7.169630  |
| Ce | 15.024960 | 17.830390 | 7.169590  |
| Ce | 9.781870  | 12.499980 | 7.053820  |
| Ce | 17.749690 | 15.239930 | 17.939840 |
| Ce | 12.312160 | 9.748870  | 17.975490 |
| Ce | 17.749690 | 15.239930 | 7.060160  |
| Ce | 12.312160 | 9.748870  | 7.024510  |
| Ce | 17.749720 | 9.760110  | 17.939830 |
| Ce | 12.312120 | 15.251050 | 17.975450 |
| Ce | 17.749720 | 9.760110  | 7.060170  |
| Ce | 12.312120 | 15.251050 | 7.024550  |
| Ce | 20.440310 | 15.236580 | 15.236640 |
| Ce | 17.749750 | 17.939860 | 15.239910 |
| Ce | 12.312070 | 7.024660  | 15.251220 |
| Ce | 20.440310 | 15.236580 | 9.763360  |
| Ce | 9.641510  | 9.719960  | 15.280040 |
| Ce | 12.312070 | 7.024660  | 9.748780  |
| Ce | 17.749750 | 17.939860 | 9.760090  |
| Ce | 9.641510  | 9.719960  | 9.719960  |
| Ce | 20.440310 | 9.763440  | 15.236590 |
| Ce | 12.312190 | 17.975470 | 15.251120 |
| Ce | 17.749750 | 7.060190  | 15.239880 |
| Ce | 20.440310 | 9.763440  | 9.763410  |
| Ce | 9.641590  | 15.280090 | 15.280080 |
| Ce | 17.749750 | 7.060190  | 9.760120  |
| Ce | 12.312190 | 17.975470 | 9.748880  |
| Ce | 9.641590  | 15.280090 | 9.719920  |
| Ce | 17.689980 | 12.499990 | 15.194520 |
| Ce | 15.008350 | 15.194440 | 15.194440 |
| Ce | 15.008320 | 9.805560  | 15.194460 |
| Ce | 17.689980 | 12.499990 | 9.805480  |

|    |           |           |           |
|----|-----------|-----------|-----------|
| Ce | 12.325140 | 12.499980 | 15.204890 |
| Ce | 15.008320 | 9.805560  | 9.805540  |
| Ce | 15.008350 | 15.194440 | 9.805560  |
| Ce | 12.325140 | 12.499980 | 9.795110  |
| Ce | 23.053210 | 12.500070 | 15.083280 |
| Ce | 15.041940 | 20.578570 | 15.094590 |
| Ce | 15.041840 | 4.421380  | 15.094620 |
| Ce | 23.053210 | 12.500070 | 9.916720  |
| Ce | 7.143590  | 12.500030 | 15.249520 |
| Ce | 15.041840 | 4.421380  | 9.905380  |
| Ce | 15.041940 | 20.578570 | 9.905410  |
| Ce | 7.143590  | 12.500030 | 9.750480  |
| Ce | 15.016960 | 12.500000 | 12.500000 |
| Ce | 20.329340 | 17.811490 | 12.500000 |
| Ce | 9.781900  | 7.053800  | 12.500000 |
| Ce | 20.290640 | 12.499980 | 12.500000 |
| Ce | 15.010390 | 17.820540 | 12.500000 |
| Ce | 15.010470 | 7.179430  | 12.500000 |
| Ce | 9.719350  | 12.499940 | 12.500000 |
| Ce | 20.329350 | 7.188500  | 12.500000 |
| Ce | 9.782050  | 17.946250 | 12.500000 |
| Ce | 4.750870  | 12.499930 | 12.500000 |
| Ce | 17.690090 | 15.194510 | 12.500000 |
| Ce | 12.325160 | 9.795090  | 12.500000 |
| Ce | 17.690120 | 9.805430  | 12.500000 |
| Ce | 12.325150 | 15.204830 | 12.500000 |
| Ce | 23.053170 | 15.083370 | 12.500000 |
| Ce | 17.615090 | 20.548410 | 12.500000 |
| Ce | 12.478330 | 4.352440  | 12.500000 |
| Ce | 7.143580  | 9.750440  | 12.500000 |
| Ce | 23.053200 | 9.916710  | 12.500000 |
| Ce | 12.478300 | 20.647690 | 12.500000 |
| Ce | 17.614990 | 4.451570  | 12.500000 |
| Ce | 7.143970  | 15.249640 | 12.500000 |
| O  | 16.612420 | 14.101190 | 21.647580 |
| O  | 13.438250 | 10.905850 | 21.690100 |
| O  | 16.612420 | 14.101190 | 3.352420  |
| O  | 13.438250 | 10.905850 | 3.309900  |
| O  | 16.612420 | 10.898830 | 21.647580 |
| O  | 13.438240 | 14.094170 | 21.690110 |
| O  | 16.612420 | 10.898830 | 3.352420  |
| O  | 13.438240 | 14.094170 | 3.309890  |
| O  | 19.091830 | 13.889350 | 19.229370 |
| O  | 13.599230 | 8.407510  | 19.230830 |
| O  | 19.091830 | 13.889350 | 5.770630  |
| O  | 16.379870 | 16.610900 | 19.234090 |
| O  | 10.892290 | 11.116620 | 19.257000 |
| O  | 13.599230 | 8.407510  | 5.769170  |

|   |           |           |           |
|---|-----------|-----------|-----------|
| O | 16.379870 | 16.610900 | 5.765910  |
| O | 10.892290 | 11.116620 | 5.743000  |
| O | 19.091860 | 11.110680 | 19.229390 |
| O | 13.599190 | 16.592490 | 19.230820 |
| O | 16.379960 | 8.389090  | 19.234060 |
| O | 19.091860 | 11.110680 | 5.770610  |
| O | 10.892240 | 13.883400 | 19.257000 |
| O | 16.379960 | 8.389090  | 5.765940  |
| O | 13.599190 | 16.592490 | 5.769180  |
| O | 10.892240 | 13.883400 | 5.743000  |
| O | 16.333620 | 13.832390 | 19.134550 |
| O | 13.675440 | 11.166990 | 19.160230 |
| O | 16.333620 | 13.832390 | 5.865450  |
| O | 13.675440 | 11.166990 | 5.839770  |
| O | 16.333680 | 11.167590 | 19.134560 |
| O | 13.675400 | 13.832980 | 19.160220 |
| O | 16.333680 | 11.167590 | 5.865440  |
| O | 13.675400 | 13.832980 | 5.839780  |
| O | 19.040050 | 13.852810 | 16.549090 |
| O | 16.345310 | 16.551420 | 16.551420 |
| O | 13.642160 | 8.443170  | 16.556870 |
| O | 19.040050 | 13.852810 | 8.450910  |
| O | 10.933170 | 11.145630 | 16.575720 |
| O | 13.642160 | 8.443170  | 8.443130  |
| O | 16.345310 | 16.551420 | 8.448580  |
| O | 10.933170 | 11.145630 | 8.424280  |
| O | 19.092630 | 8.390510  | 16.609530 |
| O | 10.866270 | 16.597550 | 16.597560 |
| O | 19.092630 | 8.390510  | 8.390470  |
| O | 10.866270 | 16.597550 | 8.402440  |
| O | 16.365800 | 13.882090 | 16.520640 |
| O | 13.602690 | 11.119090 | 16.530670 |
| O | 16.365800 | 13.882090 | 8.479360  |
| O | 13.602690 | 11.119090 | 8.469330  |
| O | 21.720170 | 13.889590 | 16.599080 |
| O | 16.379900 | 19.234110 | 16.610880 |
| O | 13.599230 | 5.769230  | 16.592530 |
| O | 21.720170 | 13.889590 | 8.400920  |
| O | 8.210200  | 11.119930 | 16.581390 |
| O | 13.599230 | 5.769230  | 8.407470  |
| O | 16.379900 | 19.234110 | 8.389120  |
| O | 8.210200  | 11.119930 | 8.418610  |
| O | 19.092550 | 16.609530 | 16.609520 |
| O | 10.866290 | 8.402410  | 16.597580 |
| O | 19.092550 | 16.609530 | 8.390480  |
| O | 10.866290 | 8.402410  | 8.402420  |
| O | 19.040040 | 11.147220 | 16.549090 |
| O | 13.642110 | 16.556830 | 16.556850 |



|   |           |           |           |
|---|-----------|-----------|-----------|
| O | 16.345350 | 8.448680  | 16.551340 |
| O | 19.040040 | 11.147220 | 8.450910  |
| O | 10.933160 | 13.854300 | 16.575730 |
| O | 16.345350 | 8.448680  | 8.448660  |
| O | 13.642110 | 16.556830 | 8.443150  |
| O | 10.933160 | 13.854300 | 8.424270  |
| O | 16.365800 | 11.117920 | 16.520640 |
| O | 13.602730 | 13.880840 | 16.530680 |
| O | 16.365800 | 11.117920 | 8.479360  |
| O | 13.602730 | 13.880840 | 8.469320  |
| O | 21.720150 | 11.110470 | 16.599090 |
| O | 13.599220 | 19.230800 | 16.592500 |
| O | 16.379970 | 5.765960  | 16.610910 |
| O | 21.720150 | 11.110470 | 8.400910  |
| O | 8.210150  | 13.880050 | 16.581360 |
| O | 16.379970 | 5.765960  | 8.389090  |
| O | 13.599220 | 19.230800 | 8.407500  |
| O | 8.210150  | 13.880050 | 8.418640  |
| O | 19.002040 | 13.880800 | 13.880800 |
| O | 16.365820 | 16.520620 | 13.882100 |
| O | 13.602690 | 8.469340  | 13.880900 |
| O | 19.002040 | 13.880800 | 11.119200 |
| O | 10.936940 | 11.117760 | 13.882240 |
| O | 13.602690 | 8.469340  | 11.119100 |
| O | 16.365820 | 16.520620 | 11.117900 |
| O | 10.936940 | 11.117760 | 11.117760 |
| O | 19.040090 | 8.450930  | 13.852810 |
| O | 10.933240 | 16.575650 | 13.854350 |
| O | 19.040090 | 8.450930  | 11.147190 |
| O | 10.933240 | 16.575650 | 11.145650 |
| O | 24.145690 | 14.092690 | 14.092620 |
| O | 16.612560 | 21.647540 | 14.101220 |
| O | 13.438330 | 3.309850  | 14.094150 |
| O | 24.145690 | 14.092690 | 10.907380 |
| O | 5.640720  | 11.126410 | 13.873310 |
| O | 13.438330 | 3.309850  | 10.905850 |
| O | 16.612560 | 21.647540 | 10.898780 |
| O | 5.640720  | 11.126410 | 11.126690 |
| O | 19.040080 | 16.549110 | 13.852820 |
| O | 10.933160 | 8.424300  | 13.854360 |
| O | 19.040080 | 16.549110 | 11.147180 |
| O | 10.933160 | 8.424300  | 11.145640 |
| O | 19.002040 | 11.119150 | 13.880770 |
| O | 13.602740 | 16.530630 | 13.880850 |
| O | 16.365820 | 8.479360  | 13.882090 |
| O | 19.002040 | 11.119150 | 11.119230 |
| O | 10.936940 | 13.882210 | 13.882240 |
| O | 16.365820 | 8.479360  | 11.117910 |

|   |           |           |           |
|---|-----------|-----------|-----------|
| O | 13.602740 | 16.530630 | 11.119150 |
| O | 10.936940 | 13.882210 | 11.117760 |
| O | 24.145680 | 10.907410 | 14.092620 |
| O | 13.438310 | 21.690090 | 14.094110 |
| O | 16.612430 | 3.352450  | 14.101180 |
| O | 24.145680 | 10.907410 | 10.907380 |
| O | 5.640760  | 13.873170 | 13.873520 |
| O | 16.612430 | 3.352450  | 10.898820 |
| O | 13.438310 | 21.690090 | 10.905890 |
| O | 5.640760  | 13.873170 | 11.126480 |
| O | 16.320160 | 13.840650 | 13.840670 |
| O | 13.630200 | 11.157120 | 13.842890 |
| O | 16.320160 | 13.840650 | 11.159330 |
| O | 13.630200 | 11.157120 | 11.157110 |
| O | 21.619930 | 13.830160 | 13.830120 |
| O | 16.333670 | 19.134530 | 13.832390 |
| O | 13.675440 | 5.839790  | 13.833020 |
| O | 21.619930 | 13.830160 | 11.169880 |
| O | 8.310800  | 11.146990 | 13.853030 |
| O | 13.675440 | 5.839790  | 11.166980 |
| O | 16.333670 | 19.134530 | 11.167610 |
| O | 8.310800  | 11.146990 | 11.146970 |
| O | 21.720180 | 8.400930  | 13.889570 |
| O | 10.892240 | 19.256950 | 13.883440 |
| O | 19.091890 | 5.770660  | 13.889340 |
| O | 21.720180 | 8.400930  | 11.110430 |
| O | 8.210280  | 16.581400 | 13.880120 |
| O | 19.091890 | 5.770660  | 11.110660 |
| O | 10.892240 | 19.256950 | 11.116560 |
| O | 8.210280  | 16.581400 | 11.119880 |
| O | 16.320130 | 11.159310 | 13.840680 |
| O | 13.630200 | 13.842860 | 13.842890 |
| O | 16.320130 | 11.159310 | 11.159320 |
| O | 13.630200 | 13.842860 | 11.157110 |
| O | 21.720180 | 16.599110 | 13.889560 |
| O | 19.091850 | 19.229380 | 13.889330 |
| O | 10.892280 | 5.743050  | 13.883430 |
| O | 21.720180 | 16.599110 | 11.110440 |
| O | 8.210200  | 8.418630  | 13.880080 |
| O | 10.892280 | 5.743050  | 11.116570 |
| O | 19.091850 | 19.229380 | 11.110670 |
| O | 8.210200  | 8.418630  | 11.119920 |
| O | 21.619930 | 11.169910 | 13.830120 |
| O | 13.675440 | 19.160200 | 13.833010 |
| O | 16.333690 | 5.865470  | 13.832410 |
| O | 21.619930 | 11.169910 | 11.169880 |
| O | 8.310860  | 13.853050 | 13.853020 |
| O | 16.333690 | 5.865470  | 11.167590 |

|   |           |           |           |
|---|-----------|-----------|-----------|
| O | 13.675440 | 19.160200 | 11.166990 |
| O | 8.310860  | 13.853050 | 11.146980 |

**Ce<sub>140</sub>O<sub>280</sub>**

|    |           |           |           |
|----|-----------|-----------|-----------|
| Ce | 4.840740  | 20.033640 | 17.093930 |
| Ce | 3.023450  | 18.202750 | 14.510500 |
| Ce | 6.671630  | 21.850920 | 14.510500 |
| Ce | 4.840740  | 20.033640 | 11.927070 |
| Ce | 6.758770  | 18.115610 | 19.825020 |
| Ce | 4.754690  | 16.246490 | 17.252470 |
| Ce | 8.627890  | 20.119680 | 17.252470 |
| Ce | 3.007910  | 14.356810 | 14.510500 |
| Ce | 6.805430  | 18.068950 | 14.510500 |
| Ce | 10.517570 | 21.866470 | 14.510500 |
| Ce | 4.754690  | 16.246490 | 11.768530 |
| Ce | 8.627890  | 20.119680 | 11.768530 |
| Ce | 6.758770  | 18.115610 | 9.195980  |
| Ce | 8.681700  | 16.192680 | 22.544170 |
| Ce | 6.641630  | 14.341640 | 19.961610 |
| Ce | 10.532740 | 18.232740 | 19.961610 |
| Ce | 4.737060  | 12.437190 | 17.267240 |
| Ce | 8.639970  | 16.234410 | 17.218650 |
| Ce | 12.437190 | 20.137320 | 17.267240 |
| Ce | 3.007910  | 10.517570 | 14.510500 |
| Ce | 6.728760  | 14.323620 | 14.510500 |
| Ce | 10.550760 | 18.145620 | 14.510500 |
| Ce | 14.356810 | 21.866470 | 14.510500 |
| Ce | 4.737060  | 12.437190 | 11.753760 |
| Ce | 8.639970  | 16.234410 | 11.802350 |
| Ce | 12.437190 | 20.137320 | 11.753760 |
| Ce | 6.641630  | 14.341640 | 9.059390  |
| Ce | 10.532740 | 18.232740 | 9.059390  |
| Ce | 8.681700  | 16.192680 | 6.476830  |
| Ce | 3.023450  | 6.671630  | 14.510500 |
| Ce | 4.754690  | 8.627890  | 17.252470 |
| Ce | 4.754690  | 8.627890  | 11.768530 |
| Ce | 6.641630  | 10.532740 | 19.961610 |
| Ce | 6.728760  | 10.550760 | 14.510500 |
| Ce | 6.641630  | 10.532740 | 9.059390  |
| Ce | 8.567530  | 12.437190 | 22.640120 |
| Ce | 8.596060  | 12.437190 | 17.223140 |
| Ce | 8.596060  | 12.437190 | 11.797860 |
| Ce | 8.567530  | 12.437190 | 6.380880  |
| Ce | 10.612030 | 14.262350 | 25.252830 |
| Ce | 10.524820 | 14.349560 | 19.876080 |
| Ce | 10.541920 | 14.332460 | 14.510500 |
| Ce | 10.524820 | 14.349560 | 9.144920  |
| Ce | 10.612030 | 14.262350 | 3.768170  |
| Ce | 12.437190 | 16.306840 | 22.640120 |
| Ce | 12.437190 | 16.278310 | 17.223140 |

|    |           |           |           |
|----|-----------|-----------|-----------|
| Ce | 12.437190 | 16.278310 | 11.797860 |
| Ce | 12.437190 | 16.306840 | 6.380880  |
| Ce | 14.341640 | 18.232740 | 19.961610 |
| Ce | 14.323620 | 18.145620 | 14.510500 |
| Ce | 14.341640 | 18.232740 | 9.059390  |
| Ce | 16.246490 | 20.119680 | 17.252470 |
| Ce | 16.246490 | 20.119680 | 11.768530 |
| Ce | 18.202750 | 21.850920 | 14.510500 |
| Ce | 4.840740  | 4.840740  | 17.093930 |
| Ce | 4.840740  | 4.840740  | 11.927070 |
| Ce | 6.805430  | 6.805430  | 14.510500 |
| Ce | 6.758770  | 6.758770  | 19.825020 |
| Ce | 6.758770  | 6.758770  | 9.195980  |
| Ce | 8.639970  | 8.639970  | 17.218650 |
| Ce | 8.639970  | 8.639970  | 11.802350 |
| Ce | 8.681700  | 8.681700  | 22.544170 |
| Ce | 8.681700  | 8.681700  | 6.476830  |
| Ce | 10.541920 | 10.541920 | 14.510500 |
| Ce | 10.524820 | 10.524820 | 19.876080 |
| Ce | 10.524820 | 10.524820 | 9.144920  |
| Ce | 10.612030 | 10.612030 | 25.252830 |
| Ce | 10.612030 | 10.612030 | 3.768170  |
| Ce | 12.437190 | 12.437190 | 17.181110 |
| Ce | 12.437190 | 12.437190 | 11.839890 |
| Ce | 12.437190 | 12.437190 | 22.477620 |
| Ce | 12.437190 | 12.437190 | 6.543380  |
| Ce | 14.332460 | 14.332460 | 14.510500 |
| Ce | 14.349560 | 14.349560 | 19.876080 |
| Ce | 14.349560 | 14.349560 | 9.144920  |
| Ce | 14.262350 | 14.262350 | 25.252830 |
| Ce | 14.262350 | 14.262350 | 3.768170  |
| Ce | 16.234410 | 16.234410 | 17.218650 |
| Ce | 16.234410 | 16.234410 | 11.802350 |
| Ce | 16.192680 | 16.192680 | 22.544170 |
| Ce | 16.192680 | 16.192680 | 6.476830  |
| Ce | 18.068950 | 18.068950 | 14.510500 |
| Ce | 18.115610 | 18.115610 | 19.825020 |
| Ce | 18.115610 | 18.115610 | 9.195980  |
| Ce | 20.033640 | 20.033640 | 17.093930 |
| Ce | 20.033640 | 20.033640 | 11.927070 |
| Ce | 6.671630  | 3.023450  | 14.510500 |
| Ce | 8.627890  | 4.754690  | 17.252470 |
| Ce | 8.627890  | 4.754690  | 11.768530 |
| Ce | 10.532740 | 6.641630  | 19.961610 |
| Ce | 10.550760 | 6.728760  | 14.510500 |
| Ce | 10.532740 | 6.641630  | 9.059390  |
| Ce | 12.437190 | 8.567530  | 22.640120 |
| Ce | 12.437190 | 8.596060  | 17.223140 |

|    |           |           |           |
|----|-----------|-----------|-----------|
| Ce | 12.437190 | 8.596060  | 11.797860 |
| Ce | 12.437190 | 8.567530  | 6.380880  |
| Ce | 14.262350 | 10.612030 | 25.252830 |
| Ce | 14.349560 | 10.524820 | 19.876080 |
| Ce | 14.332460 | 10.541920 | 14.510500 |
| Ce | 14.349560 | 10.524820 | 9.144920  |
| Ce | 14.262350 | 10.612030 | 3.768170  |
| Ce | 16.306840 | 12.437190 | 22.640120 |
| Ce | 16.278310 | 12.437190 | 17.223140 |
| Ce | 16.278310 | 12.437190 | 11.797860 |
| Ce | 16.306840 | 12.437190 | 6.380880  |
| Ce | 18.232740 | 14.341640 | 19.961610 |
| Ce | 18.145620 | 14.323620 | 14.510500 |
| Ce | 18.232740 | 14.341640 | 9.059390  |
| Ce | 20.119680 | 16.246490 | 17.252470 |
| Ce | 20.119680 | 16.246490 | 11.768530 |
| Ce | 21.850920 | 18.202750 | 14.510500 |
| Ce | 16.234410 | 8.639970  | 17.218650 |
| Ce | 18.145620 | 10.550760 | 14.510500 |
| Ce | 18.232740 | 10.532740 | 19.961610 |
| Ce | 20.137320 | 12.437190 | 17.267240 |
| Ce | 14.323620 | 6.728760  | 14.510500 |
| Ce | 14.341640 | 6.641630  | 19.961610 |
| Ce | 12.437190 | 4.737060  | 17.267240 |
| Ce | 16.234410 | 8.639970  | 11.802350 |
| Ce | 16.192680 | 8.681700  | 22.544170 |
| O  | 16.192680 | 8.681700  | 6.476830  |
| O  | 18.232740 | 10.532740 | 9.059390  |
| O  | 20.137320 | 12.437190 | 11.753760 |
| O  | 21.866470 | 14.356810 | 14.510500 |
| O  | 14.341640 | 6.641630  | 9.059390  |
| O  | 12.437190 | 4.737060  | 11.753760 |
| O  | 10.517570 | 3.007910  | 14.510500 |
| O  | 20.119680 | 8.627890  | 17.252470 |
| O  | 16.246490 | 4.754690  | 17.252470 |
| O  | 18.068950 | 6.805430  | 14.510500 |
| O  | 18.115610 | 6.758770  | 19.825020 |
| O  | 21.866470 | 10.517570 | 14.510500 |
| O  | 20.119680 | 8.627890  | 11.768530 |
| O  | 18.115610 | 6.758770  | 9.195980  |
| O  | 14.356810 | 3.007910  | 14.510500 |
| O  | 16.246490 | 4.754690  | 11.768530 |
| O  | 20.033640 | 4.840740  | 17.093930 |
| O  | 21.850920 | 6.671630  | 14.510500 |
| O  | 18.202750 | 3.023450  | 14.510500 |
| O  | 20.033640 | 4.840740  | 11.927070 |
| O  | 5.206640  | 21.915460 | 16.099300 |
| O  | 2.958920  | 19.667740 | 16.099300 |

|   |           |           |           |
|---|-----------|-----------|-----------|
| O | 5.206640  | 21.915460 | 12.921700 |
| O | 2.958920  | 19.667740 | 12.921700 |
| O | 6.806030  | 19.950370 | 15.843350 |
| O | 6.770360  | 20.066560 | 18.621560 |
| O | 4.924010  | 18.068350 | 15.843350 |
| O | 4.807820  | 18.104020 | 18.621560 |
| O | 8.695600  | 21.992460 | 15.895800 |
| O | 6.806030  | 19.950370 | 13.177650 |
| O | 4.924010  | 18.068350 | 13.177650 |
| O | 6.770360  | 20.066560 | 10.399440 |
| O | 8.695600  | 21.992460 | 13.125200 |
| O | 2.881910  | 16.178780 | 13.125200 |
| O | 4.807820  | 18.104020 | 10.399440 |
| O | 8.693870  | 18.141820 | 15.897480 |
| O | 8.631730  | 18.156230 | 18.579900 |
| O | 6.732550  | 16.180510 | 15.897480 |
| O | 6.718150  | 16.242650 | 18.579900 |
| O | 10.551920 | 20.073020 | 15.865050 |
| O | 10.528440 | 20.160090 | 18.623700 |
| O | 4.801360  | 14.322460 | 15.865050 |
| O | 4.714290  | 14.345940 | 18.623700 |
| O | 8.693870  | 18.141820 | 13.123520 |
| O | 8.623280  | 18.204880 | 21.289530 |
| O | 6.732550  | 16.180510 | 13.123520 |
| O | 6.669500  | 16.251100 | 21.289530 |
| O | 8.631730  | 18.156230 | 10.441100 |
| O | 10.551920 | 20.073020 | 13.155950 |
| O | 4.801360  | 14.322460 | 13.155950 |
| O | 6.718150  | 16.242650 | 10.441100 |
| O | 12.437190 | 22.021700 | 15.892280 |
| O | 2.852680  | 12.437190 | 15.892280 |
| O | 8.623280  | 18.204880 | 7.731470  |
| O | 6.669500  | 16.251100 | 7.731470  |
| O | 10.528440 | 20.160090 | 10.397300 |
| O | 12.437190 | 22.021700 | 13.128720 |
| O | 4.714290  | 14.345940 | 10.397300 |
| O | 2.852680  | 12.437190 | 13.128720 |
| O | 10.551710 | 16.237760 | 15.865580 |
| O | 10.536090 | 16.300700 | 18.586980 |
| O | 8.636620  | 14.322670 | 15.865580 |
| O | 8.573680  | 14.338290 | 18.586980 |
| O | 12.437190 | 18.200390 | 15.899140 |
| O | 12.437190 | 18.218680 | 18.600930 |
| O | 6.673990  | 12.437190 | 15.899140 |
| O | 6.655690  | 12.437190 | 18.600930 |
| O | 10.551710 | 16.237760 | 13.155420 |
| O | 10.517940 | 16.269030 | 21.246430 |
| O | 8.636620  | 14.322670 | 13.155420 |

|   |           |           |           |
|---|-----------|-----------|-----------|
| O | 8.605350  | 14.356440 | 21.246430 |
| O | 10.536090 | 16.300700 | 10.434020 |
| O | 10.513050 | 16.322390 | 23.916480 |
| O | 12.437190 | 18.200390 | 13.121860 |
| O | 12.437190 | 18.250920 | 21.324570 |
| O | 6.623460  | 12.437190 | 21.324570 |
| O | 6.673990  | 12.437190 | 13.121860 |
| O | 8.573680  | 14.338290 | 10.434020 |
| O | 8.551980  | 14.361320 | 23.916480 |
| O | 14.322460 | 20.073020 | 15.865050 |
| O | 4.801360  | 10.551920 | 15.865050 |
| O | 14.345940 | 20.160090 | 18.623700 |
| O | 4.714290  | 10.528440 | 18.623700 |
| O | 16.178780 | 21.992460 | 15.895800 |
| O | 2.881910  | 8.695600  | 15.895800 |
| O | 10.517940 | 16.269030 | 7.774570  |
| O | 8.605350  | 14.356440 | 7.774570  |
| O | 12.437190 | 18.218680 | 10.420070 |
| O | 14.322460 | 20.073020 | 13.155950 |
| O | 6.655690  | 12.437190 | 10.420070 |
| O | 4.801360  | 10.551920 | 13.155950 |
| O | 10.513050 | 16.322390 | 5.104520  |
| O | 8.551980  | 14.361320 | 5.104520  |
| O | 12.437190 | 18.250920 | 7.696430  |
| O | 6.623460  | 12.437190 | 7.696430  |
| O | 14.345940 | 20.160090 | 10.397300 |
| O | 4.714290  | 10.528440 | 10.397300 |
| O | 16.178780 | 21.992460 | 13.125200 |
| O | 2.881910  | 8.695600  | 13.125200 |
| O | 12.437190 | 14.345170 | 15.856820 |
| O | 12.437190 | 14.353590 | 18.526330 |
| O | 10.529210 | 12.437190 | 15.856820 |
| O | 10.520790 | 12.437190 | 18.526330 |
| O | 14.322670 | 16.237760 | 15.865580 |
| O | 14.338290 | 16.300700 | 18.586980 |
| O | 8.636620  | 10.551710 | 15.865580 |
| O | 8.573680  | 10.536090 | 18.586980 |
| O | 12.437190 | 14.345170 | 13.164180 |
| O | 12.437190 | 14.398210 | 21.190190 |
| O | 10.529210 | 12.437190 | 13.164180 |
| O | 10.476170 | 12.437190 | 21.190190 |
| O | 12.437190 | 14.353590 | 10.494670 |
| O | 12.437190 | 14.318150 | 23.807390 |
| O | 14.322670 | 16.237760 | 13.155420 |
| O | 14.356440 | 16.269030 | 21.246430 |
| O | 8.605350  | 10.517940 | 21.246430 |
| O | 8.636620  | 10.551710 | 13.155420 |
| O | 10.520790 | 12.437190 | 10.494670 |



|   |           |           |           |
|---|-----------|-----------|-----------|
| O | 10.556230 | 12.437190 | 23.807390 |
| O | 16.180510 | 18.141820 | 15.897480 |
| O | 6.732550  | 8.693870  | 15.897480 |
| O | 16.242650 | 18.156230 | 18.579900 |
| O | 6.718150  | 8.631730  | 18.579900 |
| O | 18.068350 | 19.950370 | 15.843350 |
| O | 18.104020 | 20.066560 | 18.621560 |
| O | 4.924010  | 6.806030  | 15.843350 |
| O | 4.807820  | 6.770360  | 18.621560 |
| O | 12.437190 | 14.398210 | 7.830810  |
| O | 10.476170 | 12.437190 | 7.830810  |
| O | 12.437190 | 14.690410 | 26.327150 |
| O | 10.183970 | 12.437190 | 26.327150 |
| O | 14.338290 | 16.300700 | 10.434020 |
| O | 16.180510 | 18.141820 | 13.123520 |
| O | 14.361320 | 16.322390 | 23.916480 |
| O | 16.251100 | 18.204880 | 21.289530 |
| O | 8.573680  | 10.536090 | 10.434020 |
| O | 6.732550  | 8.693870  | 13.123520 |
| O | 8.551980  | 10.513050 | 23.916480 |
| O | 6.669500  | 8.623280  | 21.289530 |
| O | 12.437190 | 14.318150 | 5.213610  |
| O | 19.667740 | 21.915460 | 16.099300 |
| O | 2.958920  | 5.206640  | 16.099300 |
| O | 10.556230 | 12.437190 | 5.213610  |
| O | 14.356440 | 16.269030 | 7.774570  |
| O | 8.605350  | 10.517940 | 7.774570  |
| O | 16.242650 | 18.156230 | 10.441100 |
| O | 6.718150  | 8.631730  | 10.441100 |
| O | 18.068350 | 19.950370 | 13.177650 |
| O | 4.924010  | 6.806030  | 13.177650 |
| O | 12.437190 | 14.690410 | 2.693850  |
| O | 10.183970 | 12.437190 | 2.693850  |
| O | 14.361320 | 16.322390 | 5.104520  |
| O | 16.251100 | 18.204880 | 7.731470  |
| O | 18.104020 | 20.066560 | 10.399440 |
| O | 19.667740 | 21.915460 | 12.921700 |
| O | 8.551980  | 10.513050 | 5.104520  |
| O | 6.669500  | 8.623280  | 7.731470  |
| O | 4.807820  | 6.770360  | 10.399440 |
| O | 2.958920  | 5.206640  | 12.921700 |
| O | 21.915460 | 5.206640  | 16.099300 |
| O | 19.667740 | 2.958920  | 16.099300 |
| O | 21.915460 | 5.206640  | 12.921700 |
| O | 19.667740 | 2.958920  | 12.921700 |
| O | 19.950370 | 6.806030  | 15.843350 |
| O | 20.066560 | 6.770360  | 18.621560 |
| O | 18.068350 | 4.924010  | 15.843350 |

|   |           |           |           |
|---|-----------|-----------|-----------|
| O | 18.104020 | 4.807820  | 18.621560 |
| O | 21.992460 | 8.695600  | 15.895800 |
| O | 16.178780 | 2.881910  | 15.895800 |
| O | 19.950370 | 6.806030  | 13.177650 |
| O | 18.068350 | 4.924010  | 13.177650 |
| O | 20.066560 | 6.770360  | 10.399440 |
| O | 21.992460 | 8.695600  | 13.125200 |
| O | 16.178780 | 2.881910  | 13.125200 |
| O | 18.104020 | 4.807820  | 10.399440 |
| O | 18.141820 | 8.693870  | 15.897480 |
| O | 18.156230 | 8.631730  | 18.579900 |
| O | 16.180510 | 6.732550  | 15.897480 |
| O | 16.242650 | 6.718150  | 18.579900 |
| O | 20.073020 | 10.551920 | 15.865050 |
| O | 20.160090 | 10.528440 | 18.623700 |
| O | 14.322460 | 4.801360  | 15.865050 |
| O | 14.345940 | 4.714290  | 18.623700 |
| O | 18.141820 | 8.693870  | 13.123520 |
| O | 18.204880 | 8.623280  | 21.289530 |
| O | 16.180510 | 6.732550  | 13.123520 |
| O | 16.251100 | 6.669500  | 21.289530 |
| O | 18.156230 | 8.631730  | 10.441100 |
| O | 20.073020 | 10.551920 | 13.155950 |
| O | 14.322460 | 4.801360  | 13.155950 |
| O | 16.242650 | 6.718150  | 10.441100 |
| O | 22.021700 | 12.437190 | 15.892280 |
| O | 12.437190 | 2.852680  | 15.892280 |
| O | 18.204880 | 8.623280  | 7.731470  |
| O | 16.251100 | 6.669500  | 7.731470  |
| O | 20.160090 | 10.528440 | 10.397300 |
| O | 22.021700 | 12.437190 | 13.128720 |
| O | 14.345940 | 4.714290  | 10.397300 |
| O | 12.437190 | 2.852680  | 13.128720 |
| O | 16.237760 | 10.551710 | 15.865580 |
| O | 16.300700 | 10.536090 | 18.586980 |
| O | 14.322670 | 8.636620  | 15.865580 |
| O | 14.338290 | 8.573680  | 18.586980 |
| O | 18.200390 | 12.437190 | 15.899140 |
| O | 18.218680 | 12.437190 | 18.600930 |
| O | 12.437190 | 6.673990  | 15.899140 |
| O | 12.437190 | 6.655690  | 18.600930 |
| O | 16.237760 | 10.551710 | 13.155420 |
| O | 16.269030 | 10.517940 | 21.246430 |
| O | 14.322670 | 8.636620  | 13.155420 |
| O | 14.356440 | 8.605350  | 21.246430 |
| O | 16.300700 | 10.536090 | 10.434020 |
| O | 16.322390 | 10.513050 | 23.916480 |
| O | 18.200390 | 12.437190 | 13.121860 |

|   |           |           |           |
|---|-----------|-----------|-----------|
| O | 18.250920 | 12.437190 | 21.324570 |
| O | 12.437190 | 6.623460  | 21.324570 |
| O | 12.437190 | 6.673990  | 13.121860 |
| O | 14.338290 | 8.573680  | 10.434020 |
| O | 14.361320 | 8.551980  | 23.916480 |
| O | 20.073020 | 14.322460 | 15.865050 |
| O | 10.551920 | 4.801360  | 15.865050 |
| O | 20.160090 | 14.345940 | 18.623700 |
| O | 10.528440 | 4.714290  | 18.623700 |
| O | 21.992460 | 16.178780 | 15.895800 |
| O | 8.695600  | 2.881910  | 15.895800 |
| O | 16.269030 | 10.517940 | 7.774570  |
| O | 14.356440 | 8.605350  | 7.774570  |
| O | 18.218680 | 12.437190 | 10.420070 |
| O | 20.073020 | 14.322460 | 13.155950 |
| O | 12.437190 | 6.655690  | 10.420070 |
| O | 10.551920 | 4.801360  | 13.155950 |
| O | 16.322390 | 10.513050 | 5.104520  |
| O | 14.361320 | 8.551980  | 5.104520  |
| O | 18.250920 | 12.437190 | 7.696430  |
| O | 12.437190 | 6.623460  | 7.696430  |
| O | 20.160090 | 14.345940 | 10.397300 |
| O | 10.528440 | 4.714290  | 10.397300 |
| O | 21.992460 | 16.178780 | 13.125200 |
| O | 8.695600  | 2.881910  | 13.125200 |
| O | 14.345170 | 12.437190 | 15.856820 |
| O | 14.353590 | 12.437190 | 18.526330 |
| O | 12.437190 | 10.529210 | 15.856820 |
| O | 12.437190 | 10.520790 | 18.526330 |
| O | 16.237760 | 14.322670 | 15.865580 |
| O | 16.300700 | 14.338290 | 18.586980 |
| O | 10.551710 | 8.636620  | 15.865580 |
| O | 10.536090 | 8.573680  | 18.586980 |
| O | 14.345170 | 12.437190 | 13.164180 |
| O | 14.398210 | 12.437190 | 21.190190 |
| O | 12.437190 | 10.529210 | 13.164180 |
| O | 12.437190 | 10.476170 | 21.190190 |
| O | 14.353590 | 12.437190 | 10.494670 |
| O | 14.318150 | 12.437190 | 23.807390 |
| O | 16.237760 | 14.322670 | 13.155420 |
| O | 16.269030 | 14.356440 | 21.246430 |
| O | 10.517940 | 8.605350  | 21.246430 |
| O | 10.551710 | 8.636620  | 13.155420 |
| O | 12.437190 | 10.520790 | 10.494670 |
| O | 12.437190 | 10.556230 | 23.807390 |
| O | 18.141820 | 16.180510 | 15.897480 |
| O | 8.693870  | 6.732550  | 15.897480 |
| O | 18.156230 | 16.242650 | 18.579900 |

|   |           |           |           |
|---|-----------|-----------|-----------|
| O | 8.631730  | 6.718150  | 18.579900 |
| O | 19.950370 | 18.068350 | 15.843350 |
| O | 20.066560 | 18.104020 | 18.621560 |
| O | 6.806030  | 4.924010  | 15.843350 |
| O | 6.770360  | 4.807820  | 18.621560 |
| O | 14.398210 | 12.437190 | 7.830810  |
| O | 12.437190 | 10.476170 | 7.830810  |
| O | 14.690410 | 12.437190 | 26.327150 |
| O | 12.437190 | 10.183970 | 26.327150 |
| O | 16.300700 | 14.338290 | 10.434020 |
| O | 18.141820 | 16.180510 | 13.123520 |
| O | 16.322390 | 14.361320 | 23.916480 |
| O | 18.204880 | 16.251100 | 21.289530 |
| O | 10.536090 | 8.573680  | 10.434020 |
| O | 8.693870  | 6.732550  | 13.123520 |
| O | 10.513050 | 8.551980  | 23.916480 |
| O | 8.623280  | 6.669500  | 21.289530 |
| O | 14.318150 | 12.437190 | 5.213610  |
| O | 21.915460 | 19.667740 | 16.099300 |
| O | 5.206640  | 2.958920  | 16.099300 |
| O | 12.437190 | 10.556230 | 5.213610  |
| O | 16.269030 | 14.356440 | 7.774570  |
| O | 10.517940 | 8.605350  | 7.774570  |
| O | 18.156230 | 16.242650 | 10.441100 |
| O | 8.631730  | 6.718150  | 10.441100 |
| O | 19.950370 | 18.068350 | 13.177650 |
| O | 6.806030  | 4.924010  | 13.177650 |
| O | 14.690410 | 12.437190 | 2.693850  |
| O | 12.437190 | 10.183970 | 2.693850  |
| O | 16.322390 | 14.361320 | 5.104520  |
| O | 18.204880 | 16.251100 | 7.731470  |
| O | 20.066560 | 18.104020 | 10.399440 |
| O | 21.915460 | 19.667740 | 12.921700 |
| O | 10.513050 | 8.551980  | 5.104520  |
| O | 8.623280  | 6.669500  | 7.731470  |
| O | 6.770360  | 4.807820  | 10.399440 |
| O | 5.206640  | 2.958920  | 12.921700 |
| O | 2.881910  | 16.178780 | 15.895800 |
